# Supplementary material for: Using Functional Annotations to Study Pairwise Interactions in Urinary Tract Infection Communities
Source: MDPI journal article supplement (doi:10.3390/genes12081221), 2021-08-06
Supplement: s1 [file s1]

# Using Functional Annotations to Study Pairwise Interactions in Urinary Rract Infection Communities

## Supplementary Tables and Figures

**Table S1.** Table containing the selected genomes for the *in silico* UTI community. A list of strains was made similar as in the experimental community. Genomes were selected from NCBI database following an order of preference by being related to urine or UTI, human isolate or lab strain, animal isolate and, finally, any other complete genome available. The information was retrieved in September 2017. U.: Uropathogenic. E.i.H.r: Environment isolate. Highly resistant. R.: representative.

| <i>Genus</i> | <i>Group</i> | <i>Strain</i>             | <i>Accession number</i> | <i>Origin</i>             |
|--------------|--------------|---------------------------|-------------------------|---------------------------|
| Escherichia  | Ecoli        | E.coli cft073             | nc_004431.1             | UPEC (U. <i>E. coli</i> ) |
| Escherichia  | Ecoli        | E. coli 536               | nc_008253.1             | UPEC,                     |
| Escherichia  | Ecoli        | E. coli IAI39             | nc_011750.1             | UPEC                      |
| Escherichia  | Ecoli        | E. coli UTI89             | nc_007946.1             | UTI isolate               |
| Escherichia  | Ecoli        | E. coli E24377A           | nc_009801.1             | Human isolate             |
| Escherichia  | Ecoli        | E. coli HS                | nc_009800.1             | Human isolate             |
| Escherichia  | Ecoli        | E. coli O83-H1-NRG857C    | nc_017634.1             | Human isolate             |
| Escherichia  | Ecoli        | E. coli O111-H-11128      | nc_013364.1             | Human isolate             |
| Escherichia  | Ecoli        | E. coli O157-H7-Sakai     | nc_002695.1             | Human isolate             |
| Escherichia  | Ecoli        | E. coli SE11DNA           | nc_011415.1             | Human isolate             |
| Escherichia  | Ecoli        | E. coli O103-H2-12009     | nc_013353.1             | Human isolate             |
| Escherichia  | Ecoli        | E. coli O104-H4-2011C3493 | nc_018658.1             | Human isolate             |
| Escherichia  | Ecoli        | E. coli SE15DNA           | nc_013654.1             | Human isolate             |
| Escherichia  | Ecoli        | E. coli BL21-DE3          | nc_012892.2             | Lab strain                |
| Escherichia  | Ecoli        | E. coli BW2952            | nc_012759.1             | Lab strain                |
| Escherichia  | Ecoli        | E. coli ATCC8739          | nc_010468.1             | Lab strain                |
| Escherichia  | Ecoli        | E. coli K12-DH10B         | nc_010473.1             | Lab strain                |
| Escherichia  | Ecoli        | E. coli K12-W3110DNA      | nc_007779.1             | Lab strain                |
| Escherichia  | Ecoli        | E. coli K12-MG1655        | nc_000913.3             | Common isolate            |
| Escherichia  | Ecoli        | E. coli SMS-3-5           | nc_010498.1             | E.i.H.r                   |
| Enterococcus | Ent          | E. faecalis fdaargos338   | cp_022059.1             | Urine isolate             |
| Enterococcus | Ent          | E. faecium Aus004         | nc_017022.1             | Human isolate             |
| Enterococcus | Ent          | E. faecium Aus0085        | nc_021994.1             | Human isolate             |
| Enterococcus | Ent          | E. faecium DO             | nc_017960.1             | Human isolate             |
| Enterococcus | Ent          | E. faecalis ATCC29212     | nz_cp008816.1           | Human isolate             |
| Enterococcus | Ent          | E. faecalis CLB21560      | nz_cp019512.1           | Human isolate             |
| Enterococcus | Ent          | E. faecalis OG1RF         | cp_017316.1             | Human isolate             |
| Enterococcus | Ent          | E. faecalis DENG1         | nz_cp0040801.1          | Human isolate             |
| Enterococcus | Ent          | E. faecalis symbioflor1   | cp_019770.1             | Lab strain                |

Continued on next page

Table S1 – continued from previous page

| <i>Genus</i>   | <i>Group</i> | <i>Strain</i>               | <i>Accession number</i> | <i>Origin</i>              |
|----------------|--------------|-----------------------------|-------------------------|----------------------------|
| Enterococcus   | Ent          | E. faecalis L12             | nz_cp018102.1           | Swine.                     |
| Enterococcus   | Ent          | E. faecalis L9              | nz_cp018004.2           | Swine                      |
| Enterococcus   | Ent          | E. faecalis D32             | nc_018221.1             | Swine                      |
| Enterococcus   | Ent          | E. faecalis KB1             | nz_cp015410.2           | Mouse                      |
| Enterococcus   | Ent          | E. faecalis sorialis        | nz_cp015883.1           | Mouse                      |
| Enterococcus   | Ent          | E. faecalis LD33            | nz_cp014949.1           | Included in dairy product  |
| Citrobacter    | KECS         | C. koseri fdaargos287       | cp_022073.1             | UTI patient urine isolate  |
| Enterobacter   | KECS         | E. cloacae atcc13047        | nc_014121.1             | Human isolate              |
| Klebsiella     | KECS         | K. pneumoniae kp36          | nz_cp017385.1           | UTI isolate                |
| Klebsiella     | KECS         | K. pneumoniae hs11286       | nc_016845.1             | Reference strain           |
| Klebsiella     | KECS         | K. oxytoca cav1335          | nz_cp011618.1           | Urine tract                |
| Pantoea        | KECS         | P. ananatis lmg5342         | nc_016816.1             | Human isolate              |
| Serratia       | KECS         | S. liquefaciens atcc27592   | nc_021741.1             | From a culture collection. |
| Morganella     | MM           | M. morganii kt              | nc_020418.1             | Human isolate              |
| Proteus        | Pm           | P. mirabilis HI4320         | nc_010554.1             | Urine isolate              |
| Proteus        | Pm           | P. mirabilis CYPM1          | nz_cp012674.1           | Urine isolate              |
| Proteus        | Pm           | P. mirabilis BB2000         | nc_022000.1             | Human isolate              |
| Proteus        | Pm           | P. mirabilis AOUC001        | nz_cp015347.1           | Human isolate              |
| Pseudomonas    | Ps           | P. aeruginosa DK2           | nc_018080.1             | Human isolate              |
| Pseudomonas    | Ps           | P. aeruginosa LESB58        | nc_011770.1             | Human isolate              |
| Proteus        | Pm           | P. mirabilis AR0059         | nz_cp020052.1           | Human isolate              |
| Proteus        | Pm           | P. mirabilis AR0155         | nz_cp021694.1           | Human isolate              |
| Proteus        | Pm           | P. mirabilis AR0159         | nz_cp021550.1           | Human isolate              |
| Proteus        | Pm           | P. mirabilis AR0156         | nz_cp021852.1           | Human isolate              |
| Pseudomonas    | Ps           | P. aeruginosa PAO1          | nc_002516.2             | Human isolate.             |
| Pseudomonas    | Ps           | P. aeruginosa SCV20265      | nc_023149.1             | Human isolate.             |
| Pseudomonas    | Ps           | P. aeruginosa PA7           | nc_009656.1             | Human isolate.             |
| Pseudomonas    | Ps           | P. aeruginosa YCBPP-PA14    | nc_008463.1             | Human isolate.             |
| Pseudomonas    | Ps           | P. aeruginosa NCGM2-S1      | nc_017549.1             | Human isolate              |
| Pseudomonas    | Ps           | P. fluorescens f113         | nc_016830.1             | Sugar-beet rhizosphere.    |
| Staphylococcus | St           | S. aureus mw2               | nc_003923.1             | R. of S. aureus            |
| Staphylococcus | St           | S. aureus Newman            | nc_009641.1             | R. of second group         |
| Staphylococcus | St           | S. haemolyticus_jcsc1435    | nc_007168.1             | Human isolate              |
| Staphylococcus | St           | S. haemolyticus Sh29-312-L2 | cp_cp011116.1           | Human isolate              |
| Staphylococcus | St           | S. haemolyticus S167        | nz_cp013911.1           | Leaf.                      |
| Staphylococcus | St           | S. capitis ayp1020          | nz_cp007601.1           | Only one available         |
| Staphylococcus | St           | S. simulans fdaargos124     | nz_cp014016.1           | Only one available         |

**Table S2.** Table containing a second selection of genomes for the *in silico* UTI community. The information was retrieved in July 2021. Genomes were selected in a similar manner with the Supplementary Table 1

| <i>Genus</i> | <i>Group</i> | <i>Strain</i>            | <i>Accession number</i> | <i>Origin</i>  |
|--------------|--------------|--------------------------|-------------------------|----------------|
| Escherichia  | Ecoli        | E.coli cft073            | nc_004431.1             | UPEC (Urinary) |
| Escherichia  | Ecoli        | E.coli 536               | nc_008253.1             | UPEC (Urinary) |
| Escherichia  | Ecoli        | E.coli IAI39             | nc_011750.1             | UPEC (Urinary) |
| Escherichia  | Ecoli        | E.coli UTI89             | nc_007946.1             | UTI isolate    |
| Escherichia  | Ecoli        | E.coli E24377A           | nc_009801.1             | Human isolate  |
| Escherichia  | Ecoli        | E.coli HS                | nc_009800.1             | Human isolate  |
| Escherichia  | Ecoli        | E.coli O83-H1-NRG857C    | nc_017634.1             | Human isolate  |
| Escherichia  | Ecoli        | E.coli O111-H-11128      | nc_013364.1             | Human isolate  |
| Escherichia  | Ecoli        | E.coli O157-H7-Sakai     | nc_002695.1             | Human isolate  |
| Escherichia  | Ecoli        | E.coli SE11DNA           | nc_011415.1             | Human isolate  |
| Escherichia  | Ecoli        | E.coli O103-H2-12009     | nc_013353.1             | Human isolate  |
| Escherichia  | Ecoli        | E.coli O104-H4-2011C3493 | nc_018658.1             | Human isolate  |
| Escherichia  | Ecoli        | E.coli SE15DNA           | nc_013654.1             | Human isolate  |
| Escherichia  | Ecoli        | E. coli EcPF5            | cp_054236               | UTI isolate    |
| Escherichia  | Ecoli        | E. coli EcPF7            | cp_054232               | UTI isolate    |
| Escherichia  | Ecoli        | E. coli EcPF14           | cp_054230               | UTI isolate    |
| Escherichia  | Ecoli        | E. coli EcPF15           | cp_054227               | UTI isolate    |
| Escherichia  | Ecoli        | E. coli EcPF16           | cp_054224               | UTI isolate    |
| Escherichia  | Ecoli        | E. coli EcPF18           | cp_054219               | UTI isolate    |
| Escherichia  | Ecoli        | E. coli EcPF40           | cp_054214               | UTI isolate    |
| Enterococcus | Ent          | E.faecalis FDAARGOS_338  | cp_022059.1             | Urine isolate  |
| Enterococcus | Ent          | E.faecium Aus004         | nc_017022.1             | Human isolate  |
| Enterococcus | Ent          | E.faecium Aus0085        | nc_021994.1             | Human isolate  |
| Enterococcus | Ent          | E.faecium DO             | nc_017960.1             | Human isolate  |
| Enterococcus | Ent          | E.faecalis ATCC29212     | nz_cp008816.1           | Human isolate  |
| Enterococcus | Ent          | E.faecalis CLB21560      | nz_cp019512.1           | Human isolate  |
| Enterococcus | Ent          | E.faecalis OG1RF         | cp_017316.1             | Human isolate  |
| Enterococcus | Ent          | E.faecalis DENG1         | nz_cp0040801.1          | Human isolate  |
| Enterococcus | Ent          | E. faecalis SF28073      | nz_cp060804             | Urine isolate  |
| Enterococcus | Ent          | E. faecalis TH4125       | nz_cp051005.1           | Urine isolate  |
| Enterococcus | Ent          | E. faecalis KUB3006      | nz_ap018538.1           | Urine isolate  |
| Enterococcus | Ent          | E. faecalis KUB3007      | nz_ap018543.1           | Urine isolate  |
| Enterococcus | Ent          | E. faecalis VE14089      | nz_cp039296.1           | Human isolate  |
| Enterococcus | Ent          | E. faecalis WE0438       | nz_od940420.1           | Urine isolate  |
| Enterococcus | Ent          | E. faecalis BX8117       | nz_od940437.1           | Urine isolate  |
| Citrobacter  | KECS         | C.koseri FDAARGOS_287    | cp_022073.1             | UTI isolate    |
| Enterobacter | KECS         | E.cloacae ATCC13047      | nc_014121.1             | Human isolate  |

Continued on next page

Table S2 – continued from previous page

| Genus          | Group | Strain                       | Accession number | Origin        |
|----------------|-------|------------------------------|------------------|---------------|
| Klensiella     | KECS  | K.pneumoniae kp36            | nz_cp017385.1    | UTI isolate   |
| Klebsiella     | KECS  | K. pneumoniae TOP52 1721     | cp_031938        | UTI isolate   |
| Klebsiella     | KECS  | K.oxytoca cav1335            | nz_cp011618.1    | Urine isolate |
| Pantoea        | KECS  | P.ananatis lmg5342           | nc_016816.1      | Human isolate |
| Serratia       | KECS  | S. liquefaciens FDAARGOS_25  | nz_cp014017      | Human isolate |
| Morganella     | MM    | M.morganii KT                | nc_020418.1      | Human isolate |
| Proteus        | Pm    | P.mirabilis HI4320           | nc_010554.1      | Urine isolate |
| Proteus        | Pm    | P.mirabilis CYPM1            | nz_cp012674.1    | Urine isolate |
| Proteus        | Pm    | P.mirabilis BB2000           | nc_022000.1      | Human isolate |
| Proteus        | Pm    | P.mirabilis AOUC001          | nz_cp015347.1    | Human isolate |
| Proteus        | Pm    | P.mirabilis AR0059           | nz_cp020052.1    | Human isolate |
| Proteus        | Pm    | P.mirabilis AR0155           | nz_cp021694.1    | Human isolate |
| Proteus        | Pm    | P.mirabilis AR0159           | nz_cp021550.1    | Human isolate |
| Proteus        | Pm    | P.mirabilis AR0156           | nz_cp021852.1    | Human isolate |
| Pseudomonas    | Ps    | P.aeruginosa DK2             | nc_018080.1      | Human isolate |
| Pseudomonas    | Ps    | P.aeruginosa LESB58          | nc_011770.1      | Human isolate |
| Pseudomonas    | Ps    | P.aeruginosa PAO1            | nc_002516.2      | Human isolate |
| Pseudomonas    | Ps    | P.aeruginosa SCV20265        | nc_023149.1      | Human isolate |
| Pseudomonas    | Ps    | P.aeruginosa PA7             | nc_009656.1      | Human isolate |
| Pseudomonas    | Ps    | P.aeruginosa YCBPP-PA14      | nc_008463.1      | Human isolate |
| Pseudomonas    | Ps    | P.aeruginosa NCGM2-S1        | nc_017549.1      | Human isolate |
| Pseudomonas    | Ps    | P. fluorescens NCTC10783     | nz_lr134300      | Human isolate |
| Staphylococcus | St    | S. aureus BLR-DV             | nz_cp058312.1    | Urine isolate |
| Staphylococcus | St    | S. aureus USA300-SUR4        | nz_cp014371      | Urine isolate |
| Staphylococcus | St    | S.haemolyticus jscs1435      | nc_007168.1      | Human isolate |
| Staphylococcus | St    | S.haemolyticus Sh29-312-L2   | cp_cp011116.1    | Human isolate |
| Staphylococcus | St    | S. haemolyticus FDAARGOS_517 | nz_cp033814.1    | Human isolate |
| Staphylococcus | St    | S.capitis ayp1020            | nz_cp007601.1    | Human isolate |
| Staphylococcus | St    | S.simulans FDAARGOS_124      | nz_cp014016.1    | Human isolate |

**Table S3.** Complementarity indices. All of them normalized by pathway length. D is the number of KO's present in the donor *d*; A is the equivalent for the acceptor *a*.

| Name              | Calculation                      |
|-------------------|----------------------------------|
| Complementarity 1 | $D - D \cap A$                   |
| Complementarity 2 | $(D \cup A)/A$                   |
| Complementarity 3 | $(D \cup A - D \cap A)/A$        |
| Complementarity 4 | $(D \cup A - D \cap A)/D \cup A$ |

**Table S4.** Competition indices. All of them normalized by pathway length. D is the number of KO's present in the donor  $d$ ; A is the equivalent for the acceptor  $a$ . Competition 1 is only written as the intersection of two sets because stating a division by pathway length is omitted for all cases.

| Name          | Calculation             |
|---------------|-------------------------|
| Competition 1 | $D \cap A$              |
| Competition 2 | $(D \cap A)/A$          |
| Competition 3 | $(D \cap A)/D \cup A$   |
| Competition 4 | Pearson correlation / A |

**Table S5.** Possible outcomes of the interactions depending on the value of  $\varepsilon$ .

| Outcome                                          | $\varepsilon$ value                                                   |
|--------------------------------------------------|-----------------------------------------------------------------------|
| Positive effect on growth                        | $N_c > N_u (\varepsilon > \ln(1.25) = 0.22)$                          |
| Neutral effect on growth                         | $N_c \approx N_u (\ln(1.25) = 0.22 > \varepsilon > \ln(0.8) = -0.22)$ |
| Negative effect on growth due to competitiveness | $N_c < N_u (\ln(0.8) = -0.22 > \varepsilon > \ln(0.6) = -0.51)$       |
| Negative effect on growth due to inhibition      | $N_c < N_u (\varepsilon < \ln(0.6) = -0.51)$                          |

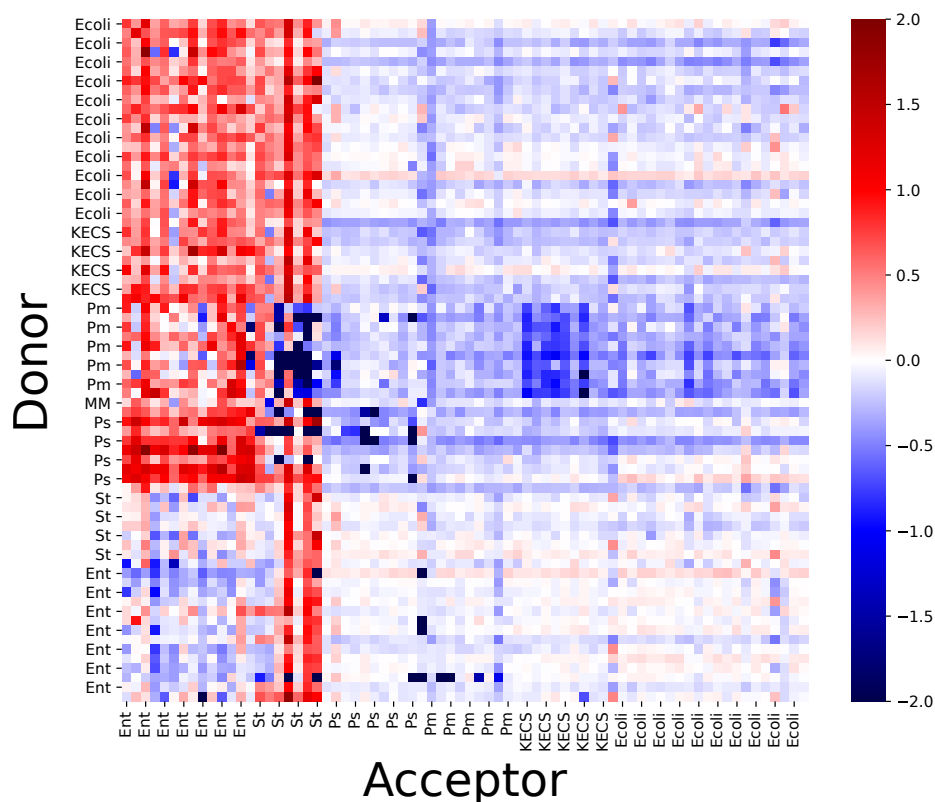

**Figure S 1.** Matrix representing the outcome of pairwise interactions, in terms of growth yield ( $MaxOD_{600}$ ) achieved by 72 UTI isolates, in medium conditioned by these same isolates. The interaction index is  $\varepsilon = \ln(\frac{N_c}{N_u})$ . The acceptors (columns) were grown in medium conditioned by the donors (rows). The interactions cluster together by phylogeny (16S phylogeny in [deVos2017], not shown here). Isolates are order symmetrically, and named by their group, from left to right: Ent (*Enterococcus* spp.), St (*Staphylococcus* spp.), Ps (*Pseudomonas* spp.), Pm (*P. mirabilis*), KECS (*Klebsiella* spp., *E. cloacae*, *C. koseri*, *S. liquefaciens*, and *Pantoea* sp4), and Ecoli (*E. coli*). There is a *M. morgani* isolate between *Pseudomonas* and *P. mirabilis*. The diagonal from left-bottom to right-up represents self-interactions. Recreated based on [deVos2017].

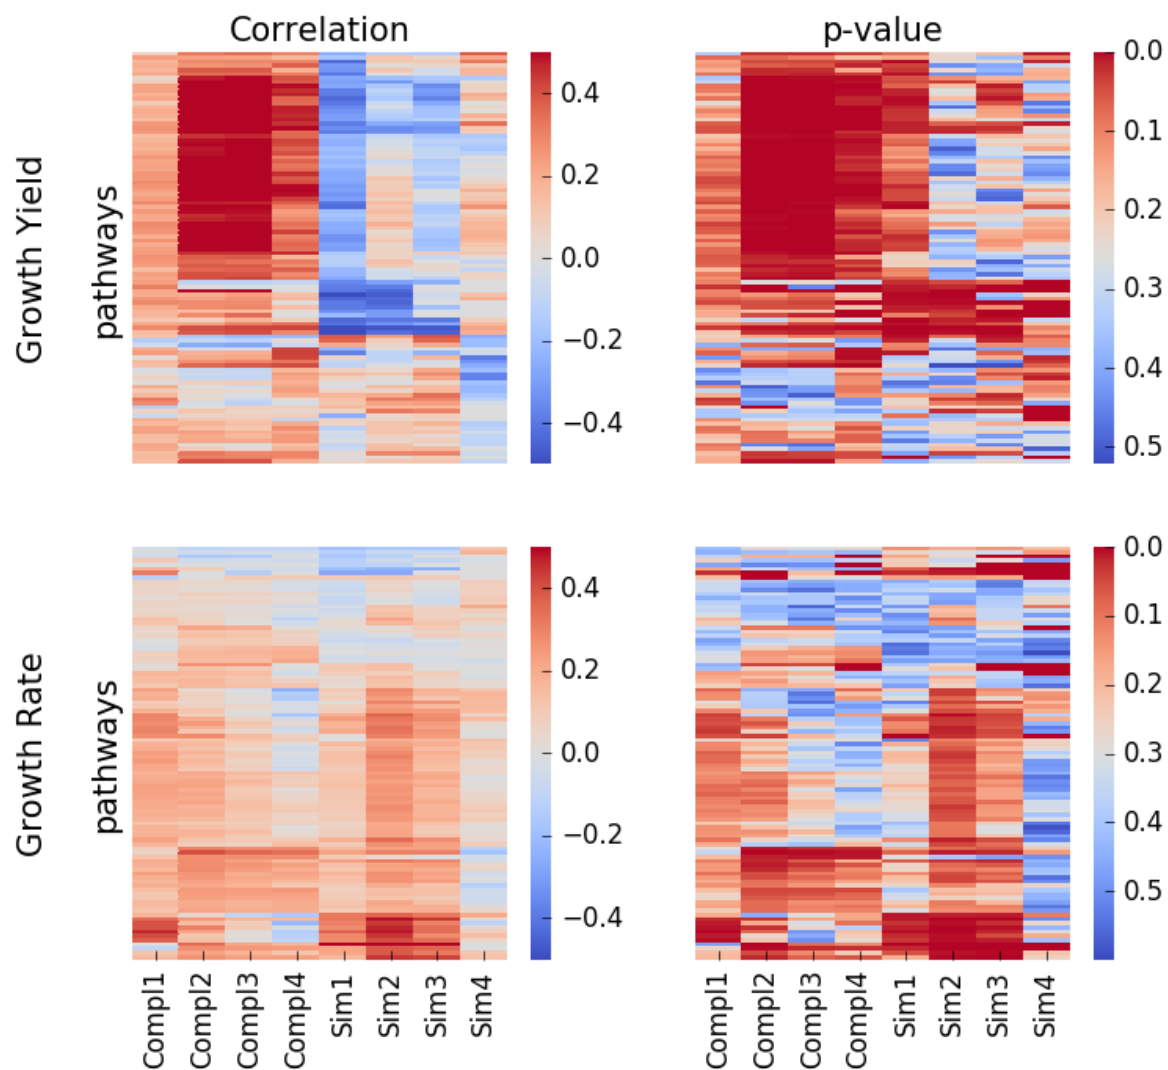

**Figure S2.** Correlation and corresponding p-values of different interaction measures. Correlation (left) and corresponding p-values (right) of different interaction measures with the values in the growth yield (up) and rate (bottom) pairwise matrices. Each row in the heatmaps represents a pathway; they are located in the same order. The measures complementarity 2 and complementarity 3 show the highest correlation, with a low p-value, for the data in growth yield. No measure correlates with the growth rate data.

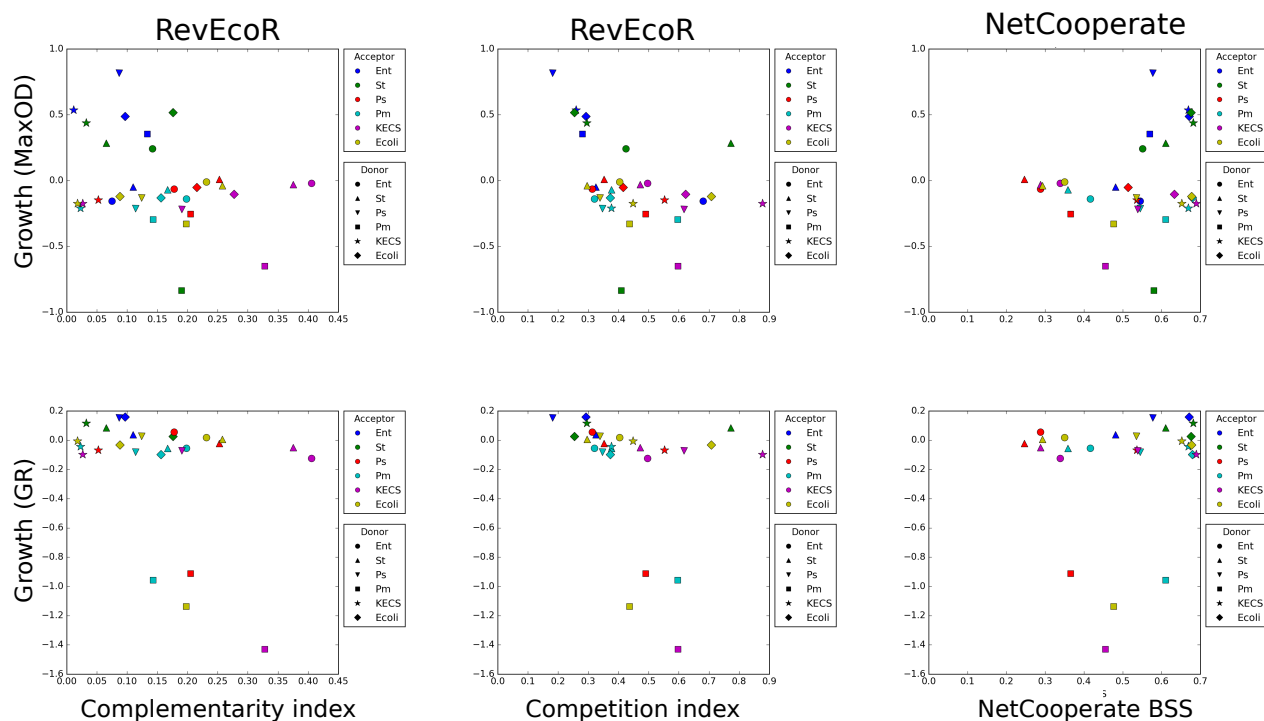

**Figure S3.** Relationship between RevEcoR and NetCooperate indexes and the experimental growth information. Interaction scatter plots depicting the relationship between the computed RevEcoR (complementarity and competition) and NetCooperate (BSS, Biosynthetic Support Score) indexes (x-axis) and the experimental growth information (y-axis). Each points represents the donor with a different shape, and the acceptor with a color; the values are grouped by the mean of the genera. Note that MM was omitted from the analysis community. The indexes are calculated for the complete set of KO's of every organism. In this case, a pattern could not be discerned.

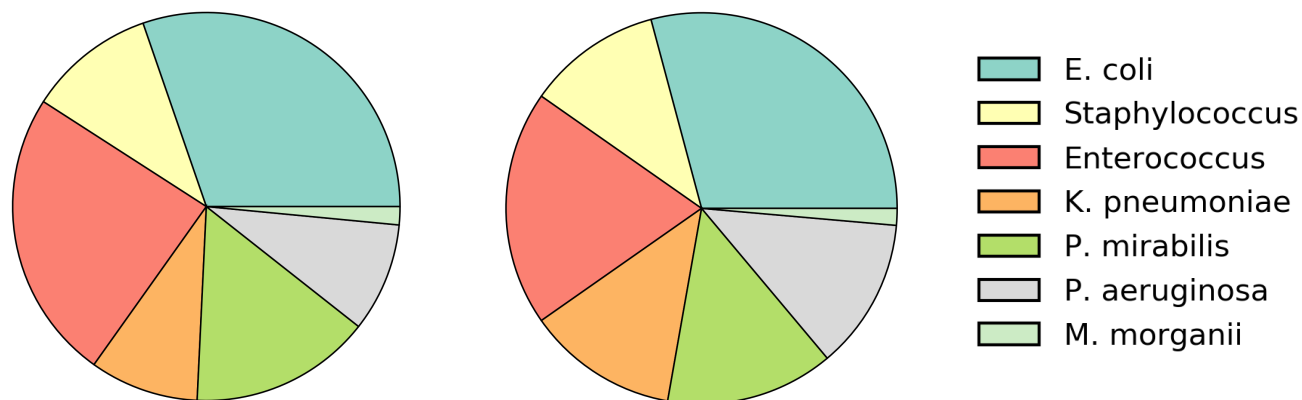

**Figure S4.** Composition of the UTI communities used for this work. The community built from 72 isolates from 23 patients (left), and the mimicking *in silico* community constructed from 66 related strains present in the NCBI database, include the same strains in a similar proportion. *E. coli* is the most abundant species, as it is present in many UTI patients.

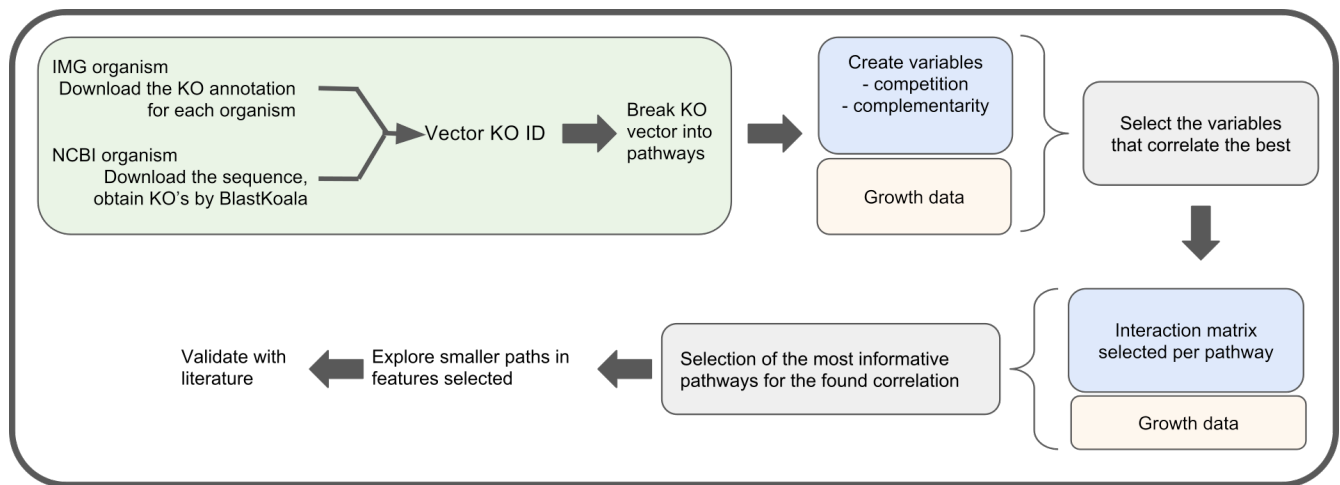

**Figure S5.** General flowchart. We started with a dataset of 66 genomes from NCBI. From them, the KEGG Ortholog (KO) annotation was retrieved from IMG database or using BlastKoala. The set of KO's obtained was then split into smaller units. We created variables related with microbial interactions that could be labeled as competition and complementarity. We then selected those who presented higher correlation with an initial pairwise interaction matrix that measured the effect in growth. The selected variables were used to select pathways that contribute to this correlation, again using the growth data. Then, they were studied visually using KEGG maps and hypothesis of interaction were created.

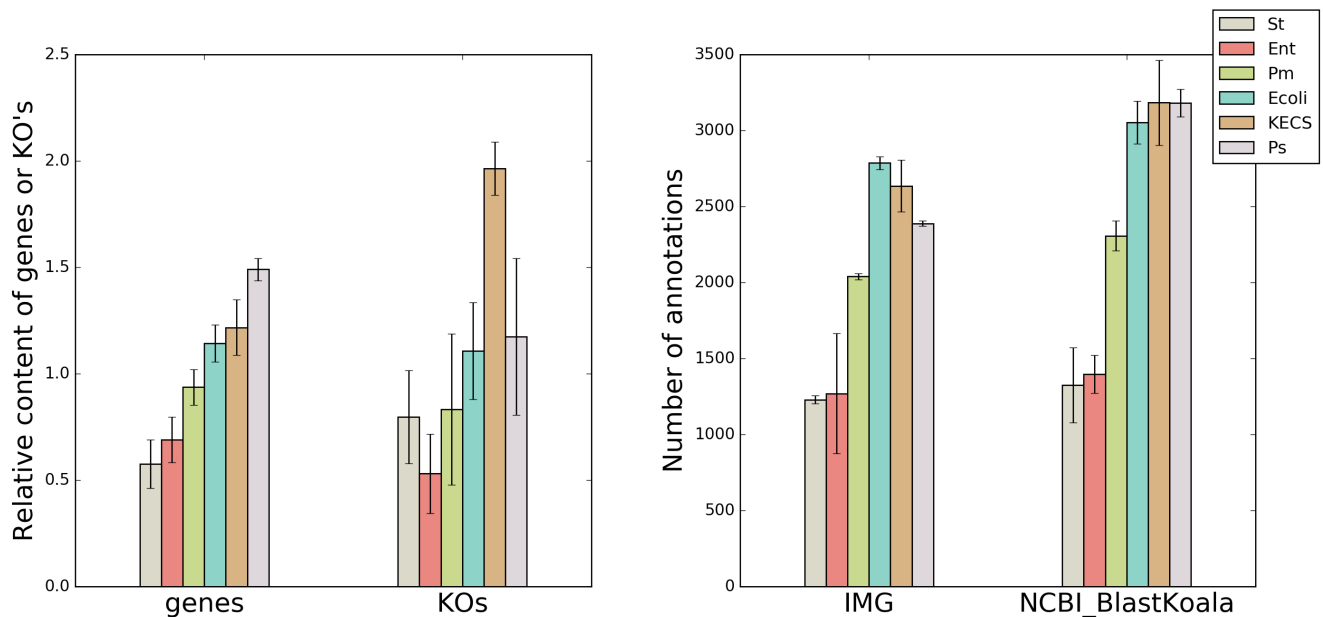

**Figure S6.** Comparison of the relative size of the genome and annotations per genera. (a) Comparison of the relative size of the genome (genes) and annotations (KO terms) per genera. Each of the bars depicts the relation between each genera's number of genes (left) or annotations (right), and the average for all genera. Interestingly, the difference in annotations for *KECS* is larger than the difference for genes, with more annotations than average for *KECS* and less annotations for enterococci. (b) Comparison of the number of annotations (KO terms) retrieved by two different approaches: NCBI genomes annotated with BlastKoala, and KO's directly downloaded from IMG. Overall retrieving the KO's using BlastKoala guarantees a higher coverage of the genome. *KECS* and *Pseudomonas* show the largest variation in the size of their KO set: 121% KO ID's obtained by the BlastKoala approach in *KECS* versus IMG, and 133% of the KO ID's in *Pseudomonas*.



**Table S6.** Similarly as Table 1 in the main text, but only on Ent as target. Pathways with high complementarity for the pairs with increased growth yield. Top ranking pathways according to the RF feature importance, the SVM coefficients, the MWU *p*-value, and the ensemble of the previous ranks.

| Pathways                                         | RF         |      | SVM    |      | MWU      |      | Ensemble |      |
|--------------------------------------------------|------------|------|--------|------|----------|------|----------|------|
|                                                  | feat. imp. | rank | coef.  | rank | p-values | rank | sum      | rank |
| Tyrosine metabolism                              | 0.047      | 7    | 0.531  | 6    | 3.1E-05  | 1    | 14       | 1    |
| Lipopolysaccharide biosynthesis                  | 0.119      | 1    | 2.265  | 1    | 3.1E-04  | 13   | 15       | 2    |
| Sulfur metabolism                                | 0.052      | 6    | 0.888  | 3    | 2.7E-04  | 12   | 21       | 3    |
| Cationic antimicrobial peptide (CAMP) resistance | 0.043      | 9    | 0.513  | 9    | 1.4E-04  | 6    | 24       | 4    |
| Phenylalanine metabolism                         | 0.069      | 3    | 0.313  | 16   | 2.2E-04  | 10   | 29       | 5    |
| Biotin metabolism                                | 0.021      | 16   | 0.385  | 14   | 7.0E-05  | 4    | 34       | 6    |
| Biofilm formation - Pseudomonas aeruginosa       | 0.056      | 5    | 0.318  | 15   | 7.2E-04  | 29   | 49       | 7    |
| Bacterial secretion system                       | 0.041      | 10   | 0.905  | 2    | 1.3E-03  | 41   | 53       | 8    |
| Glutathione metabolism                           | 0.005      | 28   | 0.243  | 22   | 9.4E-05  | 5    | 55       | 9    |
| Riboflavin metabolism                            | 0.014      | 19   | 0.518  | 8    | 6.6E-04  | 28   | 55       | 10   |
| Folate biosynthesis                              | 0.001      | 57   | 0.016  | 48   | 3.2E-04  | 15   | 120      | 30   |
| Histidine metabolism                             | 0          | 92   | -0.107 | 65   | 3.2E-04  | 14   | 171      | 64   |

**Table S7.** Repetition of the Table 2, using the new selection of genomes in Table S2. Pathways with high complementarity for the pairs with increased growth yield. Top ranking pathways according to the RF feature importance, the SVM coefficients, the MWU *p*-value, and the ensemble of the previous ranks. The information was retrieved in July 2021.

| Pathways                                         | RF         |      | SVM   |      | MWU      |      | Ensemble |      |
|--------------------------------------------------|------------|------|-------|------|----------|------|----------|------|
|                                                  | feat. imp. | rank | coef. | rank | p-values | rank | sum      | rank |
| Lipopolysaccharide biosynthesis                  | 0.111      | 2    | 2.343 | 1    | 0.005    | 11   | 14       | 1    |
| Biofilm formation - Pseudomonas aeruginosa       | 0.061      | 6    | 0.315 | 13   | 0.002    | 3    | 22       | 2    |
| Cationic antimicrobial peptide (CAMP) resistance | 0.066      | 5    | 0.329 | 11   | 0.003    | 6    | 22       | 3    |
| Phenylalanine metabolism                         | 0.081      | 3    | 0.227 | 21   | 0.003    | 4    | 28       | 4    |
| Sulfur metabolism                                | 0.041      | 7    | 1.31  | 2    | 0.008    | 20   | 29       | 5    |
| Biotin metabolism                                | 0.008      | 19   | 0.978 | 3    | 0.004    | 7    | 29       | 6    |
| Tyrosine metabolism                              | 0.008      | 20   | 0.325 | 12   | 0.002    | 1    | 33       | 7    |
| Nicotinate and nicotinamide metabolism           | 0.029      | 13   | 0.295 | 14   | 0.006    | 13   | 40       | 8    |
| Bacterial secretion system                       | 0.036      | 10   | 0.653 | 6    | 0.019    | 31   | 47       | 9    |
| Arginine biosynthesis                            | 0.007      | 22   | 0.278 | 18   | 0.004    | 8    | 48       | 10   |
| 2-Oxocarboxylic acid metabolism                  | 0.017      | 15   | 0.114 | 33   | 0.002    | 2    | 50       | 11   |
| Glutathione metabolism                           | 0.008      | 18   | 0.192 | 25   | 0.005    | 10   | 53       | 12   |
| Histidine metabolism                             | 0.04       | 9    | 0.099 | 34   | 0.007    | 15   | 58       | 13   |
| Folate biosynthesis                              | 0.001      | 69   | 0.033 | 45   | 0.045    | 51   | 165      | 56   |

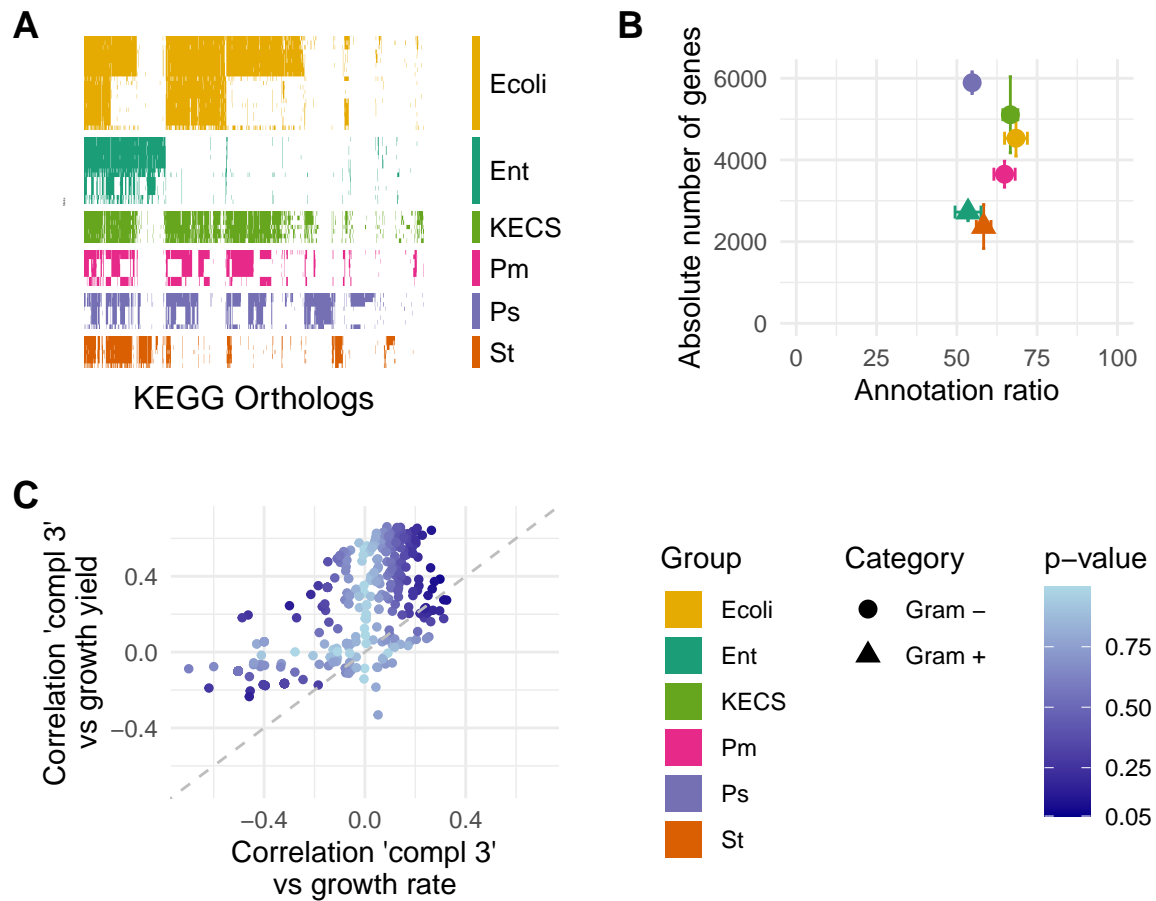

**Figure S7.** Repetition of the Figure 1, using the selection of genomes in Table S2. **(a)** Heatmap of presence (coloured) or absence (white) of KEGG Orthologs in the different bacteria groups. KEGG orthologs are grouped using a distance method relative to their Pearson correlation. The order of the KEGG orthologs on the horizontal axis therefore does not correspond to the order of Figure 1A in the main text. **(b)** While the absolute number of genes in the genome of each group varies per group, their annotation ratio from genome to KO's remains similar around 60%. **(c)** Comparison of the relation of 'complementarity 3' with the increase of two different growth measures: yield and rate (from [5]).
